# Supplementary material
Source: ML conference proceedings conference paper supplement (https://openaccess.thecvf.com/content/CVPR2024/html/Ramasinghe_Accept_the_Modality_CVPR_2024_paper.html)
Supplement: Supplementary file [file Ramasinghe_Accept_the_Modality_CVPR_2024_supplemental.pdf]

# Accept the Modality Gap: An Exploration in the Hyperbolic Space

## Supplementary Material

### A. Proof for propositions

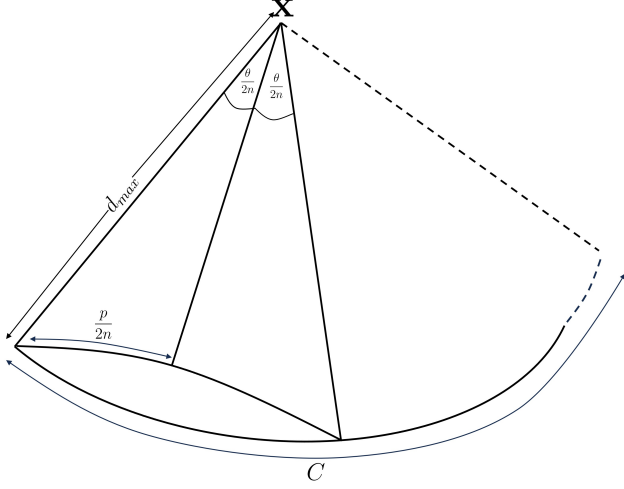

Figure 8

**Proof for proposition 1:** Consider the hyperbolic triangle formed by  $\mathbf{x}, \mathbf{y}_i, \mathbf{y}_j$ . Let the angle  $\angle \hat{\mathbf{y}}_i \mathbf{x} \mathbf{y}_j / 2 = \theta_{i,j}$  and  $d_{\mathbb{H}}(\mathbf{y}_i, \mathbf{y}_j) / 2 = d_{i,j}$ . By hyperbolic trigonometric relationships we get,

$$\sin(\theta_{i,j}) = \frac{\sinh(d_{i,j})}{\sinh(r)}$$

$$d_{i,j}(\theta_{i,j}, r) = \operatorname{arcsinh}(\sin(\theta_{i,j}) \sinh(r))$$

First, we show that  $d_{i,j}(\theta_{i,j})$  is a concave function over  $\theta_{i,j}$  (since  $r$  is fixed, we can treat  $\sinh(r) = a$  as a constant). Taking the second derivative of  $d_{i,j}(\theta_{i,j})$  we have,

$$\frac{d^2}{d\theta_{i,j}^2} d_{i,j}(\theta_{i,j}) = \frac{a^3 \sin^3(\theta_{i,j}) + (a^3 \cos^2(\theta_{i,j}) + a) \sin(\theta_{i,j})}{(a^2 \sin^2(\theta_{i,j}) + 1)^{\frac{3}{2}}},$$

Which is negative for  $\theta_{i,j} < \pi$ . Thus,  $d_{i,j}(\theta_{i,j})$  is concave for  $0 < \theta_{i,j} < \pi$ . Therefore, applying Jensen's inequality for concave functions, we have

$$\frac{\sum_{j=1}^n \operatorname{arcsinh}(\sin(\theta_{i,j})a)}{n} \leq \operatorname{arcsinh}(\sin(\frac{\sum_{j=1}^n \theta_{i,j}}{n})a).$$

One can see that the equality is achieved for equiangular  $\theta_{i,j}$ , i.e., at  $\theta_{i,j} = \frac{\pi}{n}$ ,  $\sum_{j=1}^n d_{i,j}$  is maximized. On the other

hand, [11] showed that the angle of hyperbolic entailment cones is less than  $\pi$ . Therefore, for  $n > 1$ , at least one point lies outside the cone.

**Proof for proposition 2:** We consider a hyperbolic entailment cone emanating from a point  $\mathbf{x} \in \mathbb{H}^2$ . We consider the area  $\eta$  within the cone where  $\eta = \{\mathbf{u} \in \mathbb{H}^2 \mid d_{\mathbb{H}}(\mathbf{u}, \mathbf{x}) \leq d_{max}\}$ . Let the angle of the cone be  $\theta$ . Now, we divide the cone into  $n$  equiangular hyperbolic triangles; see Fig. 8. Invoking the trigonometric relationship in the hyperbolic space, we get,

$$\sin(\frac{\theta}{2n}) = \frac{\sinh(\frac{p}{2n})}{\sinh(d_{max})}$$

$$n \sinh(d_{max}) \sin(\frac{\theta}{2n}) = n \sinh(\frac{p}{2n})$$

Then, we invoke the following Lemma.

**Lemma 1.** *If the function  $f$  is differentiable at 0 and  $k \neq 0$ , then  $nf(k/n) \rightarrow kf'(0)$  as  $n \rightarrow \infty$ .*

Consider the limit  $n \rightarrow \infty$ . Then,  $p \rightarrow C$ . Therefore we have,

$$\frac{\theta}{2} \sinh(d_{max}) = C/2$$

$$C = \theta \sinh(d_{max})$$

Now, we invoke the following lemma.

**Lemma 2.** *If a hyperbolic triangle  $ABC$  has a right angle at  $A$ , and  $d(A, B) = c$ ,  $d(B, C) = a$ ,  $d(C, A) = b$ , then its hyperbolic area  $\tau$  is given by  $\sin(\tau) = \frac{\sinh(b) \sinh(c)}{(\cosh(a)+1)}$ .*

Let the sum of the areas of the triangles be  $m$ . Then using the above result, we get,

$$\sin(m/2n) = \frac{\sinh(a) \sinh(p/2n)}{(\cosh(r) + 1)}$$

$$2n \sin(m/2n) = \frac{\sinh(a) 2n \sinh(p/2n)}{(\cosh(r) + 1)}$$

Now let  $n \rightarrow \infty$ . Then  $m \rightarrow \eta$  and  $p \rightarrow C$ . Again, by Lemma 1, we get,

$$\eta = \frac{\sinh(d_{max})C}{(\cosh(d_{max}) + 1)} = \frac{\theta \sinh(d_{max}) \sinh(d_{max})}{(\cosh(d_{max}) + 1)}$$

By applying hyperbolic trigonometric relationships, we get,

$$\eta = 2\theta \sinh^2\left(\frac{d_{max}}{2}\right)$$

Now, since  $\sinh(x) = \frac{e^x - e^{-x}}{2}$ , consider,

$$\lim_{d_{max} \rightarrow \infty} \frac{\eta}{e^{d_{max}}}$$

Clearly, the above limit is larger than 1 at the infinity. Therefore,  $\eta$  decreases exponentially with  $d_{max}$ , which completes the proof.

## B. Hyperparameters and training details

Our training setups closely resemble those of MERU. We employ the AdamW optimizer, setting the parameters  $(\beta_1, \beta_2)$  to  $(0.9, 0.98)$  and applying a weight decay of 0.2, except for biases and learnable scalars where weight decay is not applied. Our models undergo training across 120,000 iterations, each with a batch size of 2048. The peak learning rate is set to  $5 \times 10^{-4}$ , which initially increases linearly over the first 4000 iterations and then undergoes a cosine decay down to zero. For data augmentation, we randomly crop 50–100% area of images and resize them to  $224 \times 224$ .

## C. Experiments on a larger model

To validate if our empirical findings extend to larger architectures, we conduct experiments with a model using ViT B/16 as the base architecture. The results are illustrated in Table 6, 7, 8, 9, and 10. As shown, our results hold for larger architectures.

## D. Suitability for curved spaces

We noticed that when the curvature of the models are trainable, MERU’s loss tend to suppress the curvature until it gets clamped at 0.01. Intuitively, when the curvature gets lowered, the hyperbolic space converges towards an Euclidean space. On the other hand, with our loss, the curvature tends to increase; see Fig. 13. This can probably be attributed to the fact that our loss is more suitable for curved spaces. MERU’s inability to converge in higher curvatures provides further evidence for this hypothesis.

|          |      | Food-101 | CIFAR-10 | CIFAR-100 | CUB  | SUN397 | Aircraft | DTD  | Pets | Caltech-101 | Flowers | STL-10 | EuroSAT | RESISC45 | Country211 | MNIST | CLEVR | PCAM | SST2 |
|----------|------|----------|----------|-----------|------|--------|----------|------|------|-------------|---------|--------|---------|----------|------------|-------|-------|------|------|
| ViT S/16 | CLIP | 83.8     | 89.0     | 71.4      | 68.0 | 58.8   | 44.1     | 68.3 | 89.8 | 84.5        | 96.4    | 95.0   | 95.9    | 87.7     | 13.9       | 98.5  | 83.9  | 56.4 | 55.3 |
|          | MERU | 83.6     | 89.1     | 71.1      | 67.5 | 58.2   | 41.4     | 67.9 | 88.4 | 83.9        | 94.9    | 94.9   | 95.6    | 86.5     | 13.7       | 98.3  | 84.4  | 57.6 | 55.3 |
|          | Ours | 83.9     | 88.8     | 70.9      | 68.4 | 57.8   | 39.8     | 67.3 | 87.6 | 82.9        | 95.0    | 94.6   | 95.6    | 87.1     | 13.5       | 98.2  | 82.9  | 54.1 | 54.8 |
| ViT B/16 | CLIP | 86.1     | 91.2     | 74.2      | 70.4 | 61.3   | 49.2     | 70.5 | 90.6 | 86.0        | 96.5    | 95.7   | 96.5    | 89.0     | 15.2       | 99.0  | 86.4  | 55.7 | 56.6 |
|          | MERU | 85.5     | 90.9     | 72.8      | 68.8 | 59.1   | 47.3     | 68.9 | 89.0 | 83.5        | 95.9    | 95.2   | 96.3    | 87.8     | 14.5       | 98.8  | 84.3  | 55.2 | 56.9 |
|          | Ours | 85.9     | 90.4     | 73.1      | 67.1 | 60.4   | 48.2     | 67.4 | 89.1 | 83.2        | 96.2    | 95.4   | 95.9    | 88.4     | 16.1       | 98.8  | 85.2  | 55.9 | 56.7 |

Table 6. **Linear probe evaluation.** We train a logistic regression classifier on embeddings extracted from the image encoders of CLIP, MERU and our model.

|      | ImageNet | Food-101 | CIFAR-10 | CIFAR-100 | CUB  | SUN397 | Aircraft | DTD  | Pets | Caltech-101 | Flowers | STL-10 | EuroSAT | RESISC45 | Country211 | MNIST | CLEVR | PCAM | SST2 |
|------|----------|----------|----------|-----------|------|--------|----------|------|------|-------------|---------|--------|---------|----------|------------|-------|-------|------|------|
| CLIP | 30.9     | 73.0     | 57.9     | 27.7      | 30.4 | 23.2   | 1.4      | 10.1 | 64.8 | 58.6        | 49.7    | 88.0   | 26.7    | 26.0     | 4.3        | 7.7   | 16.0  | 50.5 | 50.0 |
| MERU | 30.6     | 74.3     | 63.2     | 28.1      | 30.9 | 24.3   | 1.8      | 11.2 | 70.5 | 59.0        | 48.1    | 87.6   | 17.4    | 22.2     | 4.0        | 10.2  | 14.1  | 50.1 | 50.8 |
| Ours | 31.1     | 74.7     | 64.1     | 28.9      | 30.3 | 24.7   | 1.1      | 14.3 | 71.1 | 59.2        | 48.3    | 88.3   | 22.9    | 23.4     | 6.1        | 11.1  | 10.9  | 50.8 | 51.1 |

Table 7. **Zero shot image classification performance with ViT B/16 architecture.** We show overall better performance over both MERU and CLIP.

|      | <i>text → image</i> |      |        |      | <i>image → text</i> |      |        |      |
|------|---------------------|------|--------|------|---------------------|------|--------|------|
|      | COCO                |      | Flickr |      | COCO                |      | Flickr |      |
|      | R5                  | R10  | R5     | R10  | R5                  | R10  | R5     | R10  |
| CLIP | 25.1                | 33.9 | 34.3   | 45.0 | 28.0                | 36.9 | 36.3   | 45.3 |
| MERU | 25.1                | 34.0 | 34.3   | 44.5 | 28.3                | 37.4 | 36.8   | 46.4 |
| Ours | 25.1                | 34.1 | 34.6   | 44.9 | 28.7                | 38.4 | 38.9   | 47.2 |

Table 8. **Zero-shot image and text retrieval with ViT B/16 architecture.** We show overall better performance over both MERU and CLIP.

|             |         |      | Curvatures |      |      |      |      |      |
|-------------|---------|------|------------|------|------|------|------|------|
|             |         |      | 0.1        | 0.2  | 0.5  | 1.0  | 2.0  | 3.0  |
| Car Parts   | depth-1 | MERU | 21.1       | 18.1 | -    | 5.1  | -    | -    |
|             |         | Ours | 94.6       | 93.3 | 93.3 | 83.7 | 93.7 | 88.8 |
|             | depth-2 | MERU | 0.0        | 0.0  | -    | 0.6  | -    | -    |
|             |         | Ours | 33.5       | 28.6 | 28.6 | 28.6 | 32.9 | 29.8 |
| Open Images | depth-1 | MERU | 31.1       | 34.6 | -    | 26.3 | -    | -    |
|             |         | Ours | 67.9       | 67.8 | 67.8 | 64.7 | 65.7 | 68.2 |
|             | depth-2 | MERU | 10.2       | 12.8 | -    | 9.1  | -    | -    |
|             |         | Ours | 33.2       | 34.2 | 34.0 | 30.7 | 31.0 | 33.6 |

Table 9. **Image hierarchy accuracy (%) with ViT B/16 architecture.** Our method significantly outperforms MERU.

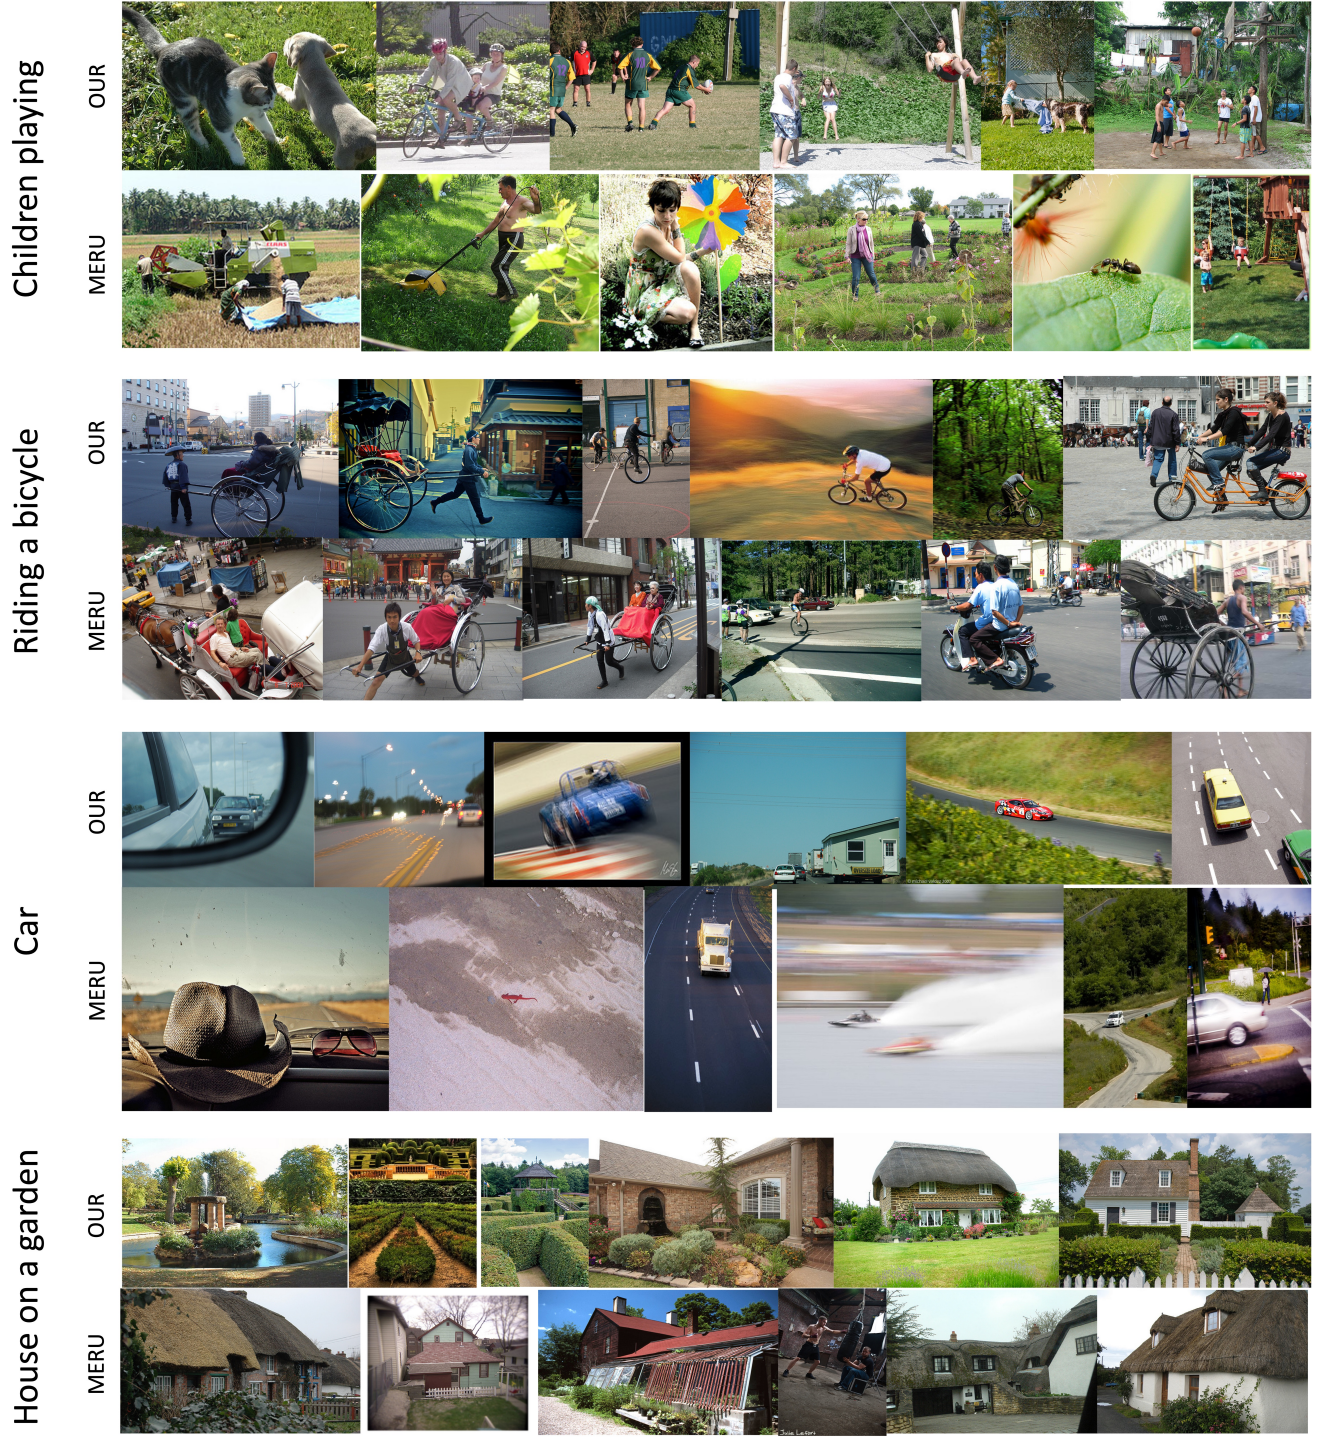

Figure 9. **Qualitative results showing visual hierarchy as a measure of uncertainty in image retrieval.** As illustrated, when the distance to the [ROOT] increases (left → right), our model retrieves similar images with an increasing hierarchical order where the text prompt is better described.

|      |                                                                                                                                                           |                                                                                                                                                      |                                                                                                                                          |                                                                                                                                                      |
|------|-----------------------------------------------------------------------------------------------------------------------------------------------------------|------------------------------------------------------------------------------------------------------------------------------------------------------|------------------------------------------------------------------------------------------------------------------------------------------|------------------------------------------------------------------------------------------------------------------------------------------------------|
|      |                                                                          |                                                                     |                                                        |                                                                   |
| OURS | <ul style="list-style-type: none"> <li>- domestic animals</li> <li>- birthday party</li> <li>- family</li> <li>- Enjoying</li> <li>- beautiful</li> </ul> | <ul style="list-style-type: none"> <li>- Bike ride</li> <li>- Athlete</li> <li>- photography</li> </ul>                                              | <ul style="list-style-type: none"> <li>- food art</li> <li>- kids food</li> <li>- food</li> <li>- delicious</li> <li>- beauty</li> </ul> | <ul style="list-style-type: none"> <li>- employees</li> <li>- business</li> <li>- day</li> </ul>                                                     |
| MERU | <ul style="list-style-type: none"> <li>- foodlover</li> <li>- birthday party</li> <li>- family</li> <li>- Having fun</li> </ul>                           | <ul style="list-style-type: none"> <li>- destination</li> <li>- iconic</li> <li>- small</li> <li>- little</li> </ul>                                 | <ul style="list-style-type: none"> <li>- food photography</li> <li>- food</li> <li>- food meal</li> </ul>                                | <ul style="list-style-type: none"> <li>- birthday party</li> <li>- business</li> </ul>                                                               |
|      |                                                                          |                                                                     |                                                        |                                                                   |
| OURS | <ul style="list-style-type: none"> <li>- presents</li> <li>- Christmas</li> <li>- imagination</li> <li>- celebration</li> <li>- beauty</li> </ul>         | <ul style="list-style-type: none"> <li>- floating on water</li> <li>- sea animals</li> <li>- sea life</li> <li>- little</li> <li>- beauty</li> </ul> | <ul style="list-style-type: none"> <li>- vegetables</li> <li>- day</li> <li>- market</li> <li>- economy</li> </ul>                       | <ul style="list-style-type: none"> <li>- latte foam</li> <li>- latte art</li> <li>- morning coffee</li> <li>- delicious</li> <li>- beauty</li> </ul> |
| MERU | <ul style="list-style-type: none"> <li>- birthday party</li> <li>- business</li> <li>- kicking</li> </ul>                                                 | <ul style="list-style-type: none"> <li>- sea life</li> <li>- incredible</li> </ul>                                                                   | <ul style="list-style-type: none"> <li>- vegetables</li> <li>- birthday party</li> <li>- portrait</li> <li>- kicking</li> </ul>          | <ul style="list-style-type: none"> <li>- latte</li> </ul>                                                                                            |
|      |                                                                        |                                                                   |                                                      |                                                                 |
| OURS | <ul style="list-style-type: none"> <li>- town</li> <li>- tourist attraction</li> <li>- tourist spot</li> <li>- urban</li> </ul>                           | <ul style="list-style-type: none"> <li>- A beautiful living room with furniture</li> <li>- Sofa</li> <li>- Furniture</li> <li>- Cozy</li> </ul>      | <ul style="list-style-type: none"> <li>- Colosseum</li> <li>- historical</li> <li>- Beautiful</li> <li>- photography</li> </ul>          | <ul style="list-style-type: none"> <li>- Mountains</li> <li>- Dawn</li> <li>- Cozy</li> <li>- Observation</li> <li>- photography</li> </ul>          |
| MERU | <ul style="list-style-type: none"> <li>- athens</li> <li>- town</li> <li>- urban</li> </ul>                                                               | <ul style="list-style-type: none"> <li>- A beautiful living room with furniture</li> </ul>                                                           | <ul style="list-style-type: none"> <li>- taj mahal through an arch</li> <li>- historical</li> <li>- photography</li> </ul>               | <ul style="list-style-type: none"> <li>- Dawn</li> <li>- Scenery</li> </ul>                                                                          |

Figure 10. **Qualitative examples of the superior text hierarchy of our model.** We retrieve multiple text descriptions while traversing from an image embedding to [ROOT]. Our model is able to retrieve richer hierarchical text descriptions compared to MERU.

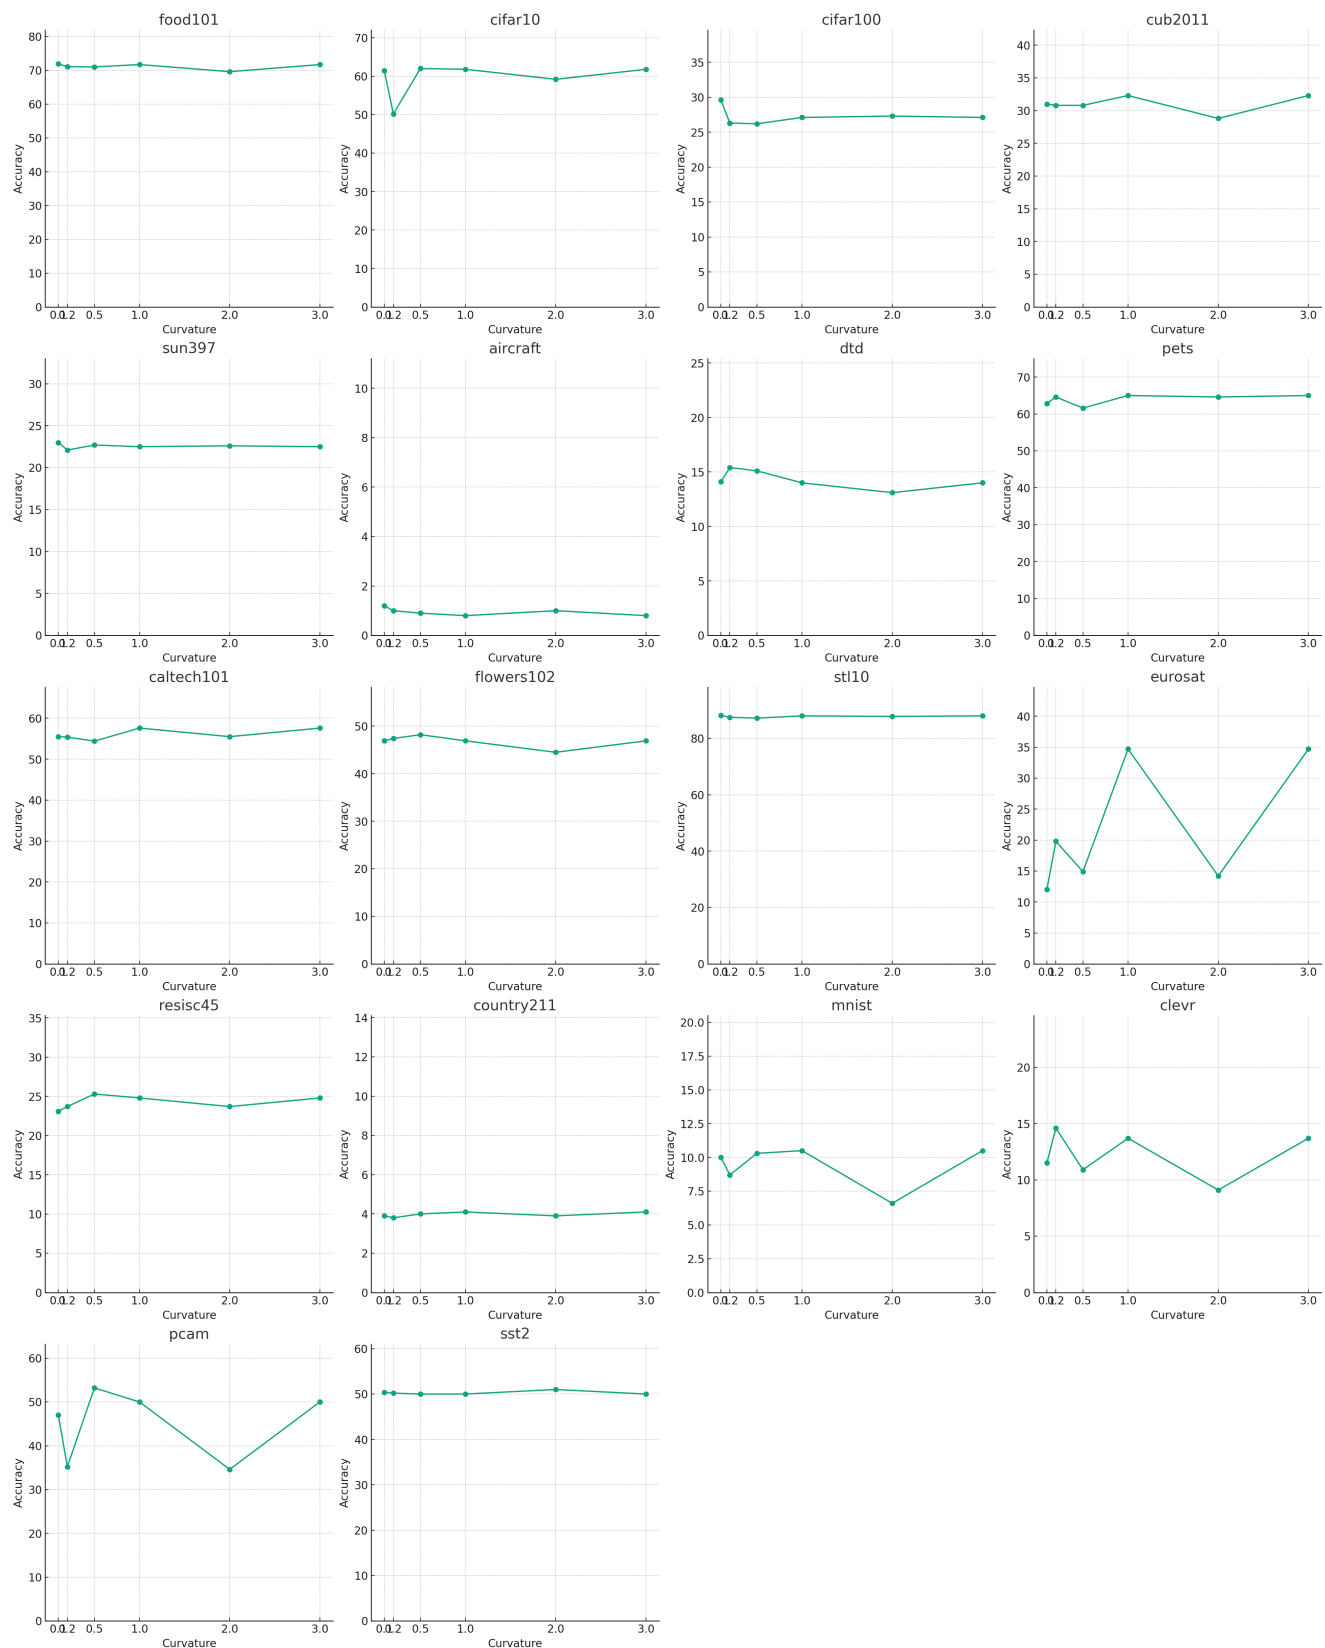

Figure 11. **Zero shot classification performance over curvature on different datasets.** Our model is able to maintain a an approximately consistent performance over varying curvature. In contrast, MERU did not converge for curvatures larger than 0.2.

|         |      | Curvatures  |             |      |             |      |      |
|---------|------|-------------|-------------|------|-------------|------|------|
|         |      | 0.1         | 0.2         | 0.5  | 1.0         | 2.0  | 3.0  |
| depth-1 | MERU | 83.1        | 81.9        | -    | 80.9        | -    | -    |
|         | Ours | <b>90.3</b> | <b>92.2</b> | 92.7 | <b>93.3</b> | 88.8 | 91.7 |
| depth-2 | MERU | 57.7        | 50.4        | -    | 54.4        | -    | -    |
|         | Ours | <b>67.1</b> | <b>67.3</b> | 69.0 | <b>66.6</b> | 63.2 | 68.6 |

Table 10. **Text hierarchy accuracy (%) with ViT B/16 architecture.** Our method further improves text hierarchies.

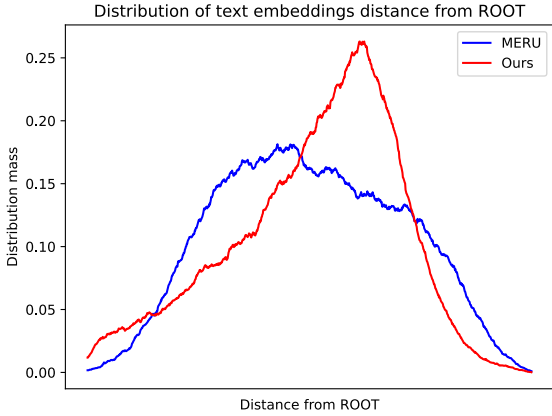

Figure 12. **Distribution of the text embeddings of our approach and MERU.** The skew appearance of our approach aligns with a hierarchical structure where the taxonomy of concepts generally expand such that high-level concepts populate the areas closer to [ROOT] and low-level details further away.

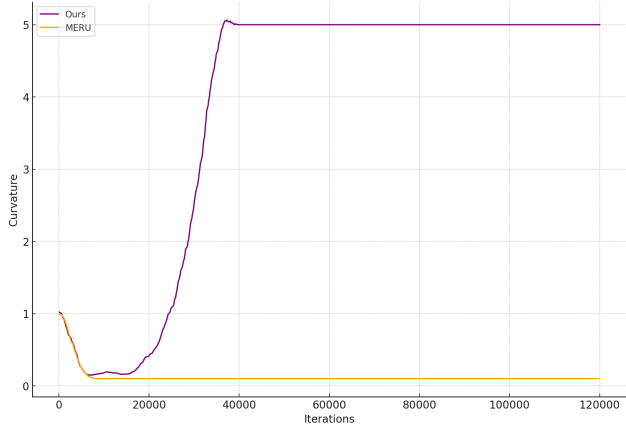

Figure 13. **Behavior of the curvature while training.** When the curvature is trainable, MERU suppresses the curvature until it gets clamped at 0.1. In contrast, our model increases the curvature. This maybe an indication of the better suitability of our loss for curved spaces.

|                         | ImageNet | Food-101 | CIFAR-10 | CIFAR-100 | CUB  | SUN397 | Aircraft | DTD  | Pets | Caltech-101 | Flowers | STL-10 | EuroSAT | RESISC45 | Country211 | MNIST | CLEVR | PCAM | SST2 |
|-------------------------|----------|----------|----------|-----------|------|--------|----------|------|------|-------------|---------|--------|---------|----------|------------|-------|-------|------|------|
| Ours                    | 29.7     | 71.7     | 61.8     | 27.1      | 32.3 | 22.5   | 0.8      | 14.0 | 65.0 | 57.6        | 46.9    | 88.0   | 34.7    | 24.8     | 4.1        | 10.5  | 13.7  | 50.0 | 50.0 |
| Ours (w/o Einstein reg) | 29.5     | 71.3     | 61.8     | 27.0      | 32.1 | 22.7   | 0.9      | 15.1 | 64.8 | 57.8        | 46.5    | 87.5   | 34.3    | 24.9     | 4.9        | 11.8  | 15.5  | 50.0 | 50.2 |

Table 11. **Effect of the Einstein regularization loss in zero shot image classification.** We noticed that having the regularization marginally improves the results.

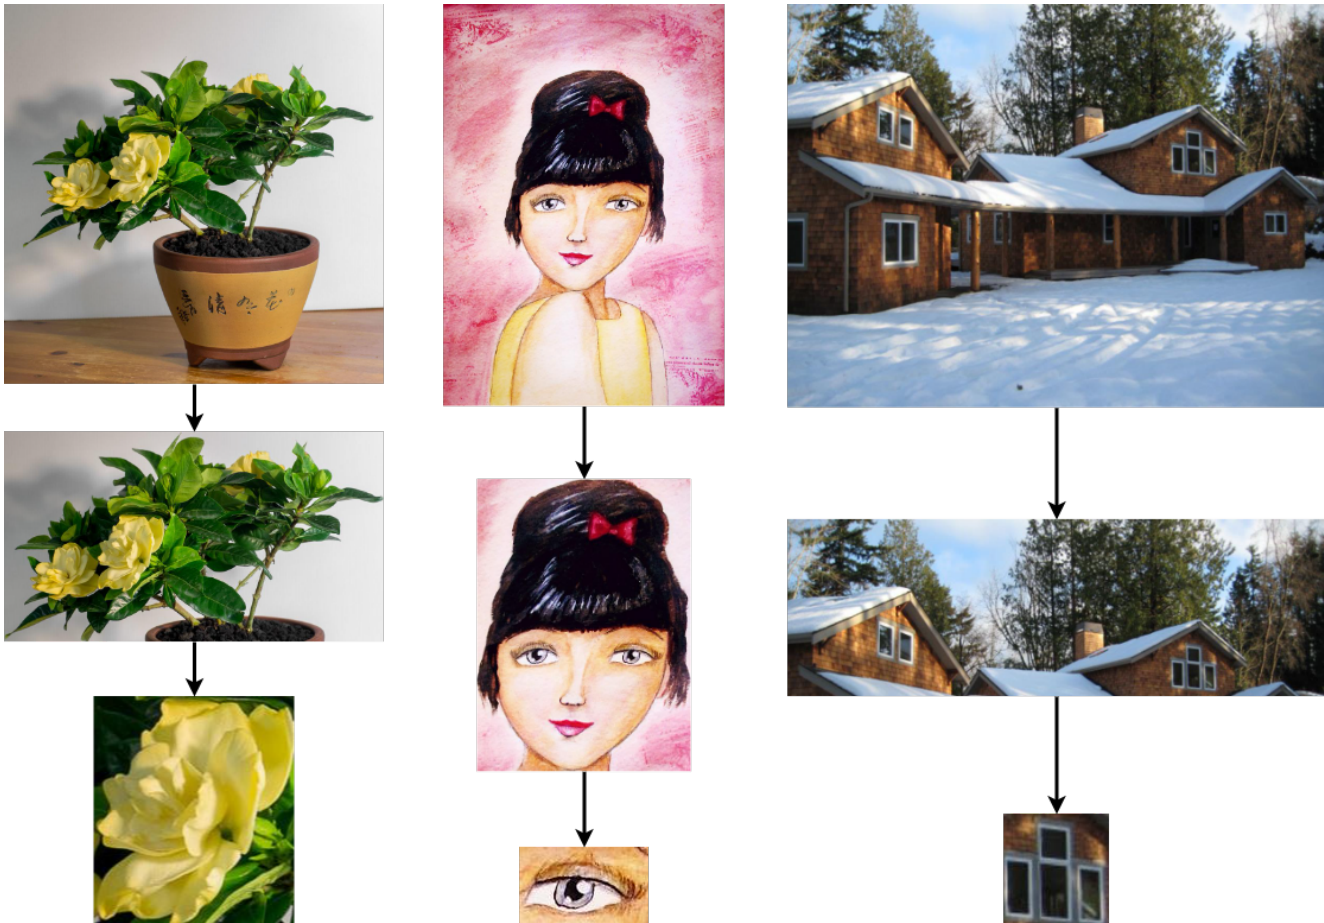

Figure 14. An illustration of the OpenImage hierarchies used to evaluate the models.



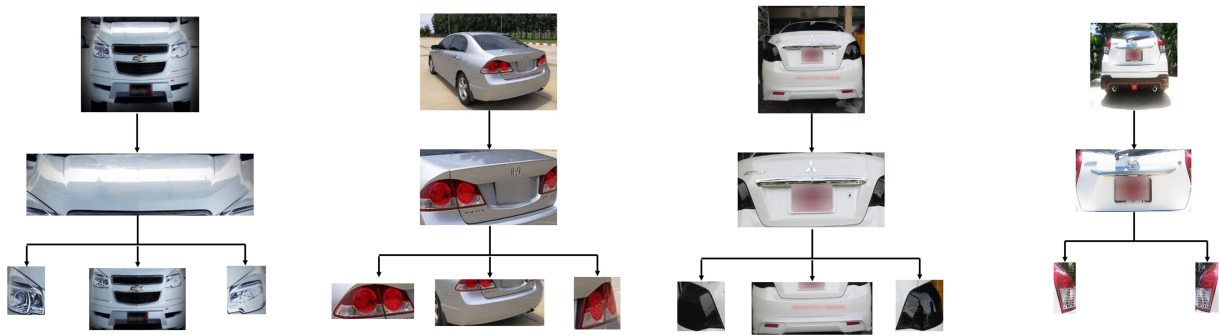

Figure 15. An illustration of the car parts hierarchies used to evaluate the models.
